# Supplementary material for: A quinoxalinophenazinedione covalent triazine framework for boosted high-performance aqueous zinc-ion batteries
Source: Royal Society of Chemistry journal article supplement (doi:10.1039/d2ta03655j), 2022-01-01
Supplement: d2ta03655j1.pdf [file d2ta03655j1.pdf]

## Electronic Supplementary Information

### **Quinoxalinophenazinedione covalent triazine framework for boosted aqueous zinc-ion battery**

Yiyun Wang,<sup>a</sup> Xinlei Wang,<sup>a</sup> Jian Tang<sup>a,b</sup> and Weihua Tang<sup>\*a,b</sup>

Y. Wang, X. Wang, J. Tang, Prof. Dr. W. Tang

<sup>a</sup>School of Chemical Engineering, Nanjing University and Science and Technology, Nanjing, 210094 (China)

J. Tang, Prof. Dr. W. Tang

<sup>b</sup>The Institute of Flexible Electronics (IFE, Future Technologies), Xiamen University, Xiamen, 361005 (China)

E-mail: [whtang@xmu.edu.cn](mailto:whtang@xmu.edu.cn)

#### **Table of Content**

|                                                                           |    |
|---------------------------------------------------------------------------|----|
| 1. Materials synthesis.....                                               | 2  |
| 2. Electrode preparation.....                                             | 3  |
| 3. Characterization.....                                                  | 3  |
| 4. FT-IR data, MS and SSNMR spectra.....                                  | 4  |
| 5. SEM images.....                                                        | 6  |
| 6. TGA and isothermal desorption.....                                     | 6  |
| 7. XPS of TTPQ.....                                                       | 7  |
| 8. AZIBs tests.....                                                       | 7  |
| 9. SEM of TTPQ.....                                                       | 10 |
| 10. Ex-situ <b>characterization during charge/discharge process</b> ..... | 11 |
| 11. DFT calculation.....                                                  | 13 |

## 1. Materials synthesis

**Synthesis of 2,9-dicyano-5,7,12,14-tetraaza-6,13-pentacenequinone (DCTPQ).** DCTPQ was synthesized by a modified method according to the previous report.<sup>S1</sup> Firstly, 2,5-dihydroxy-1,4-benzoquinone (DHBQ, 1.00 g, 7.14 mmol, Energy Chemical) and 3,4-diaminobenzonitrile (DABZ, 3.80 g, 28.55 mmol, Energy Chemical) were mixed thoroughly using a pestle and mortar. The mixture was heated at 180°C for 6 h under nitrogen flow. After cooling to room temperature, the mixture was filtered and washed several times with deionized water and acetone, and then dried for 18 hours in a vacuum at 80°C. The deep purple DDTAP powder was obtained in a yield of up to 95%. Secondly, 25 mL H<sub>2</sub>SO<sub>4</sub> (98%) was diluted with 100 mL deionized water, and as-prepared DDTAP (1.40 g, 4.19 mmol) was added into the solution. After gradually adding K<sub>2</sub>Cr<sub>2</sub>O<sub>7</sub> (4.93 g, 16.75 mmol) as an oxidant, the mixture was heated at 80°C for 5 h and then poured into 200 mL ice water. The product was then filtered, washed with deionized water and acetone subsequently, and dried at 80°C in vacuum for 18 h. Finally, the DCTPQ yellow powder was obtained with 70% yield. <sup>1</sup>H NMR (500 MHz, DMSO-d<sub>6</sub>, δ): 9.11 (s, 1H), 8.59 (d, 2H), 8.41 (d, 2H). MALDI-TOF MS: m/z = 362.0549 [M]<sup>+</sup>, calcd. for C<sub>20</sub>H<sub>6</sub>N<sub>6</sub>O<sub>2</sub>, 362.0552.

**Synthesis of Poly(triazine-5,7,12,14-tetraaza-6,13-pentacenequinone) (TTPQ).** Trifluoromethanesulfonic acid and 40 mL CHCl<sub>3</sub> were placed in a pre-dried 2-neck flask with round bottom in N<sub>2</sub> atmosphere. The mixture was cooled to 0°C and DCTPQ (0.362 g, 1 mmol) in 100 mL CHCl<sub>3</sub> was added to the solution droplet by droplet over 30 min. The mixture was stirred at 0°C for another 2 h and then left overnight at room temperature. The solution turned dark green, forming a solid precipitate. The mixture was then poured into 200 ml of water containing 10 ml of ammonia solution and stirred for 3 hours. The precipitate was filtered and washed in sequence with water, ethanol, acetone and chloroform. TTPQ (0.224 g, 56.5% yield) is a dark brown solid. <sup>13</sup>C SSNMR (125 MHz, DMSO-d<sub>6</sub>, δ): 168.65, 164.65, 139.09, 137.10, 128.60.

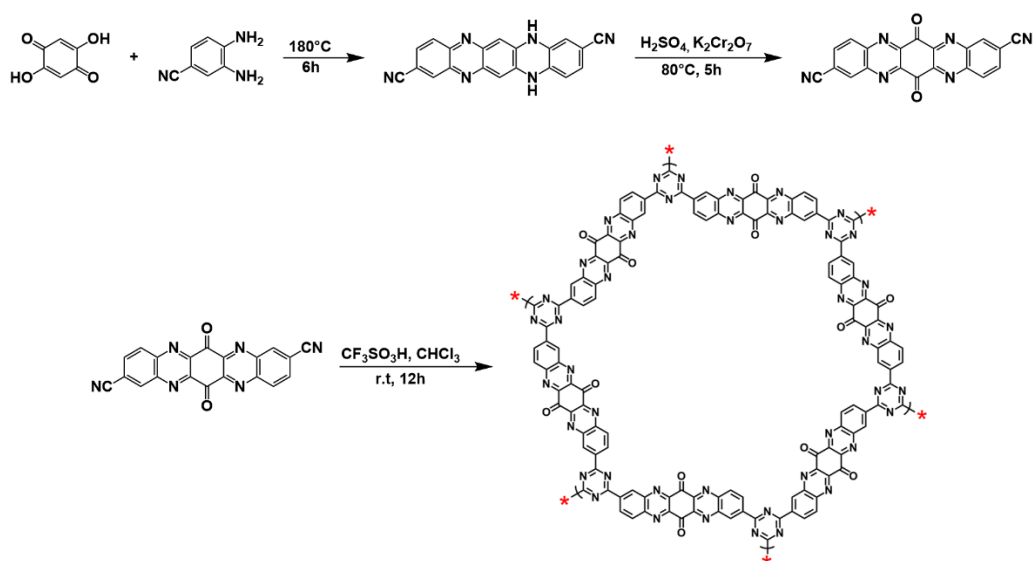

**Figure S1.** Synthesis route to TTPQ via DCTPQ.

## 2. Electrode preparation

To prepare the DCTPQ or TTPQ cathode, 60 wt% DCTPQ or TTPQ powder, 30 wt% KB conductive carbon (vinyl ketone carbon black, EC-600JD) and 10 wt% polytetrafluoroethylene (PTFE) binder were mixed and ground in a mortar. The mixture was then coated on a stainless mesh current collector and dried overnight at  $60^{\circ}\text{C}$ . The electrochemical performance of TTPQ in 1 M  $\text{H}_2\text{SO}_4$  aqueous electrolyte was measured by three-electrode system (TTPQ working electrode, platinum as the counter electrode, Ag/AgCl electrode as the reference electrode). To test AZIBs performance, 2M  $\text{ZnSO}_4$  aqueous electrolyte was simply prepared by dissolving zinc sulfate heptahydrate ( $\text{ZnSO}_4 \cdot 7\text{H}_2\text{O}$ , 99%, Aladdin) in deionized water and assembled in a CR2032 coin cell in ambient air by using a glass fiber septum (Whatman, GF/B) to separate the zinc anodes (15 and 0.5 mm in diameter and thickness, respectively) from the DCTPQ or TTPQ cathode with 2 M  $\text{ZnSO}_4$  aqueous solution as the electrolyte.

## 3. Characterization

The FT-IR spectra were copied from ThermoFisher Nicolet iS-10. Field-emission scanning electron microscope (SEM) images were obtained from J Hitachi S-4800 at

an accelerating voltage of 3 kV. Transmission electron microscopy (TEM) images were obtained from FEI F20.  $^1\text{H}$  NMR spectra were recorded on a Bruker ADVANCE 500 MHz spectrometer with trimethylsilane (TMS) as the internal reference. Solid state  $^{13}\text{C}$  cross-polarization magic angle spinning nuclear magnetic resonance (CP/MAS NMR) spectra were taken on a Bruker AVANCE NEO 400 WB spectrometer (Bruker BioSpin AG, Fällanden, Switzerland) spectrometer. Mass spectra were measured using GCT-MS EI and Bruker Daltonics Biflex III MALDI-TOF Analyzer in the MALDI mode. X-ray diffraction (XRD) patterns were recorded from Bruker D8 Advance Diffractometer. X-ray photoelectron spectroscopy (XPS) analysis was carried out on a Thermo ESCALAB 250 X-ray photoelectron spectrometer. Thermogravimetric analysis was conducted by TGA/SDTA851E (Mettler Toledo). Nitrogen ( $\text{N}_2$ ) adsorption-desorption curve was measured by 3Flex three-station all-purpose gas adsorber (Micromeritics, America). All DFT calculations were performed in Gaussian09 code at the B3LYP/6-31(d) level. All electrochemical measurements were conducted on a CHI 760E electrochemical workstation (Chenhua, Shanghai).

#### 4. FT-IR data, MS and SSNMR spectra

| Bond and Vibration Type                    | DDTAP                                         | DCTPQ                                         |
|--------------------------------------------|-----------------------------------------------|-----------------------------------------------|
| N-H, stretching                            | 3250–2683 $\text{cm}^{-1}$                    |                                               |
| C-H, stretching                            | 3250–2683 $\text{cm}^{-1}$                    | 2988 $\text{cm}^{-1}$                         |
| $\text{C}\equiv\text{N}$ , stretching      | 2219 $\text{cm}^{-1}$                         | 2234 $\text{cm}^{-1}$                         |
| $\text{C}=\text{O}$ , stretching           |                                               | 1714 $\text{cm}^{-1}$                         |
| $\text{C}=\text{N}$ , stretching           | 1617 $\text{cm}^{-1}$ , 1579 $\text{cm}^{-1}$ | 1620 $\text{cm}^{-1}$ , 1531 $\text{cm}^{-1}$ |
| $\text{C}=\text{C}$ , stretching           | 1477 $\text{cm}^{-1}$ , 1446 $\text{cm}^{-1}$ | 1483 $\text{cm}^{-1}$ , 1434 $\text{cm}^{-1}$ |
| $\text{C}-\text{CO}-\text{C}$ , stretching |                                               | 1056 $\text{cm}^{-1}$                         |

**Table S1.** FT-IR spectra of DDTAP and DCTPQ

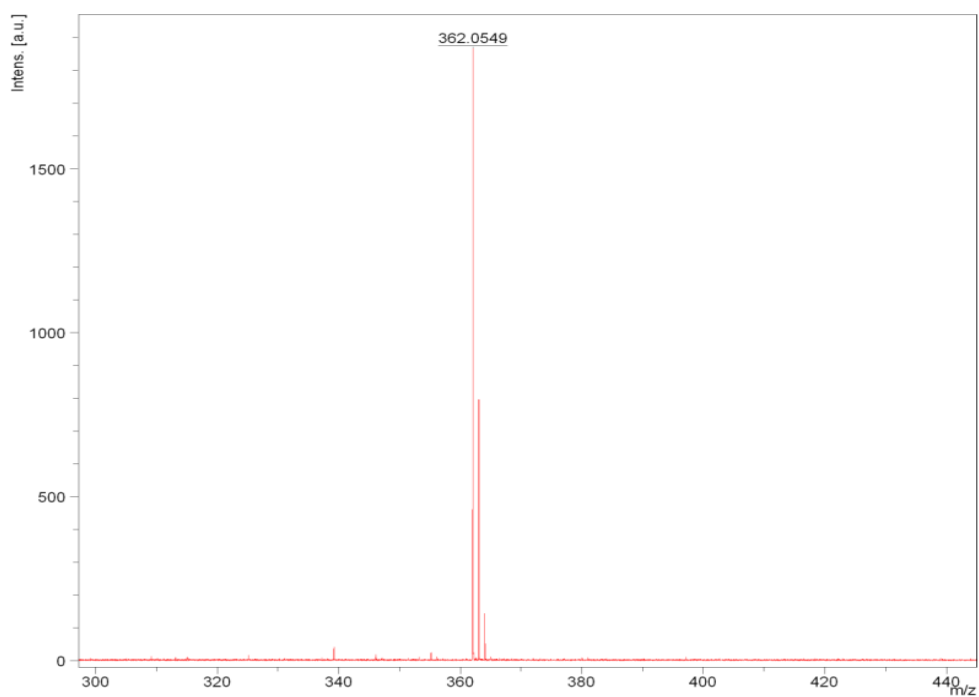

**Figure S2.** MADLI-TOF mass spectrum of DCTPQ.

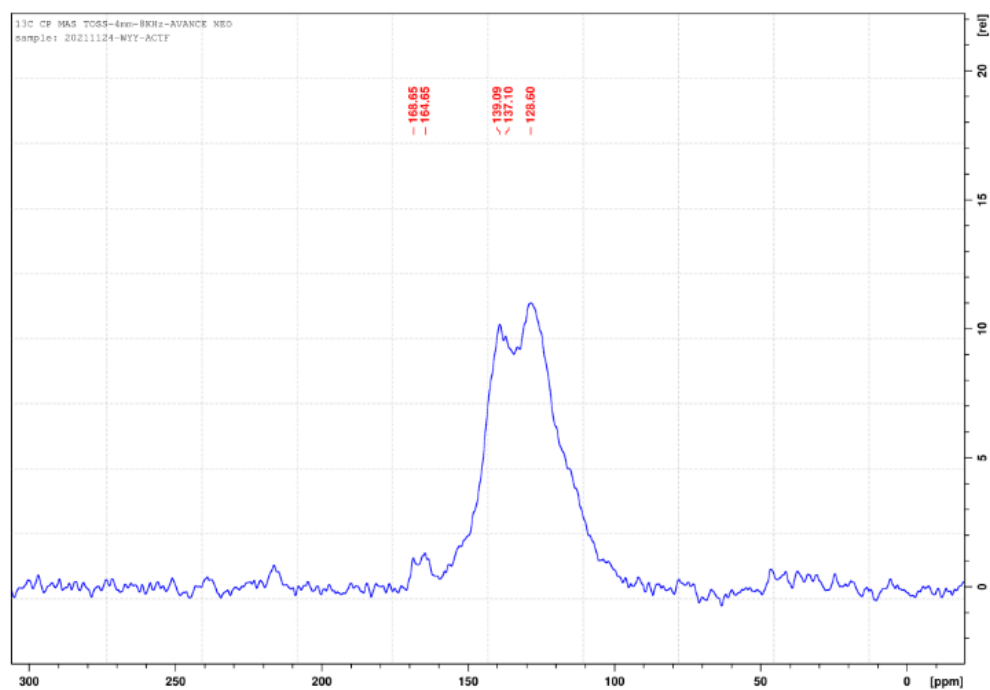

**Figure S3.** <sup>13</sup>C SSNMR spectrum of TTPQ.

## 5. SEM images

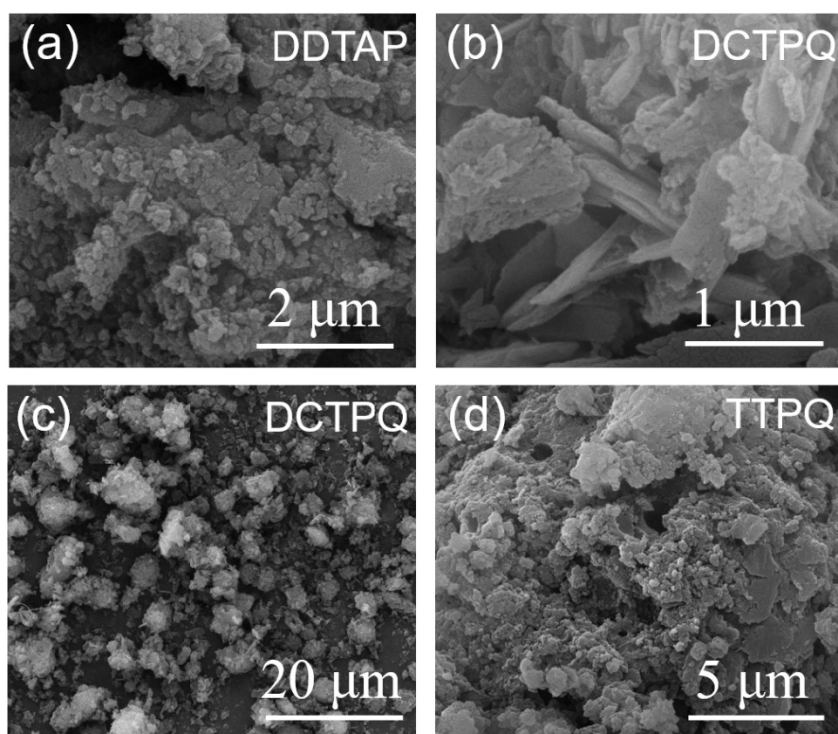

Figure S4. SEM image of (a) DDTAP, (b, c) DCTPQ, (d) TTPQ.

## 6. TGA and isothermal desorption

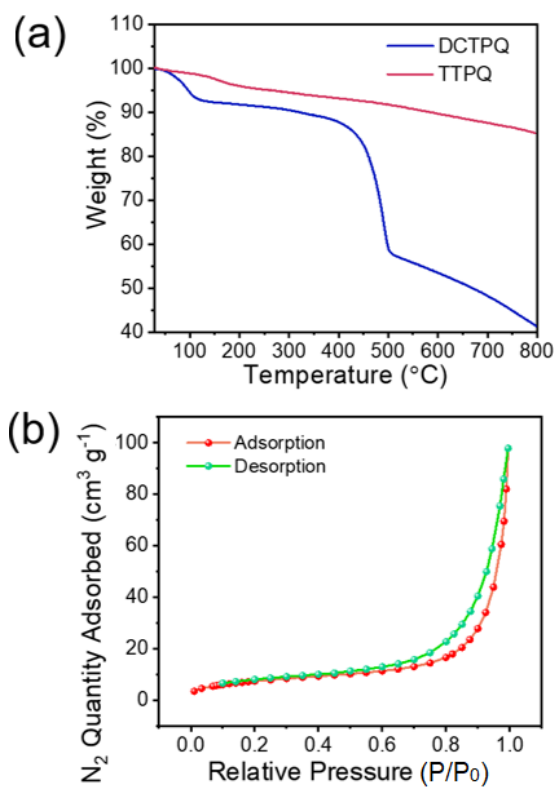

Figure S5. (a) TGA curves of DCTPQ and TTPQ. (b) Nitrogen (N<sub>2</sub>) adsorption-desorption curves of TTPQ.

## 7. XPS of TTPQ

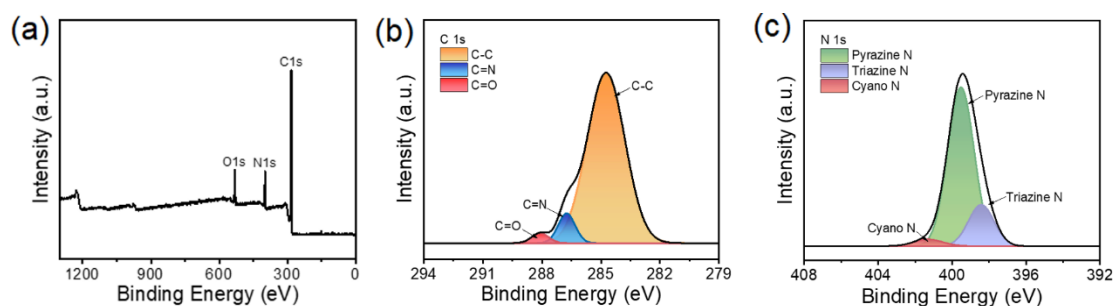

**Figure S6.** XPS spectra of TTPQ for (a) full spectrum, (b) C 1s, and (d) N 1s. XPS

## 8. AZIBs tests

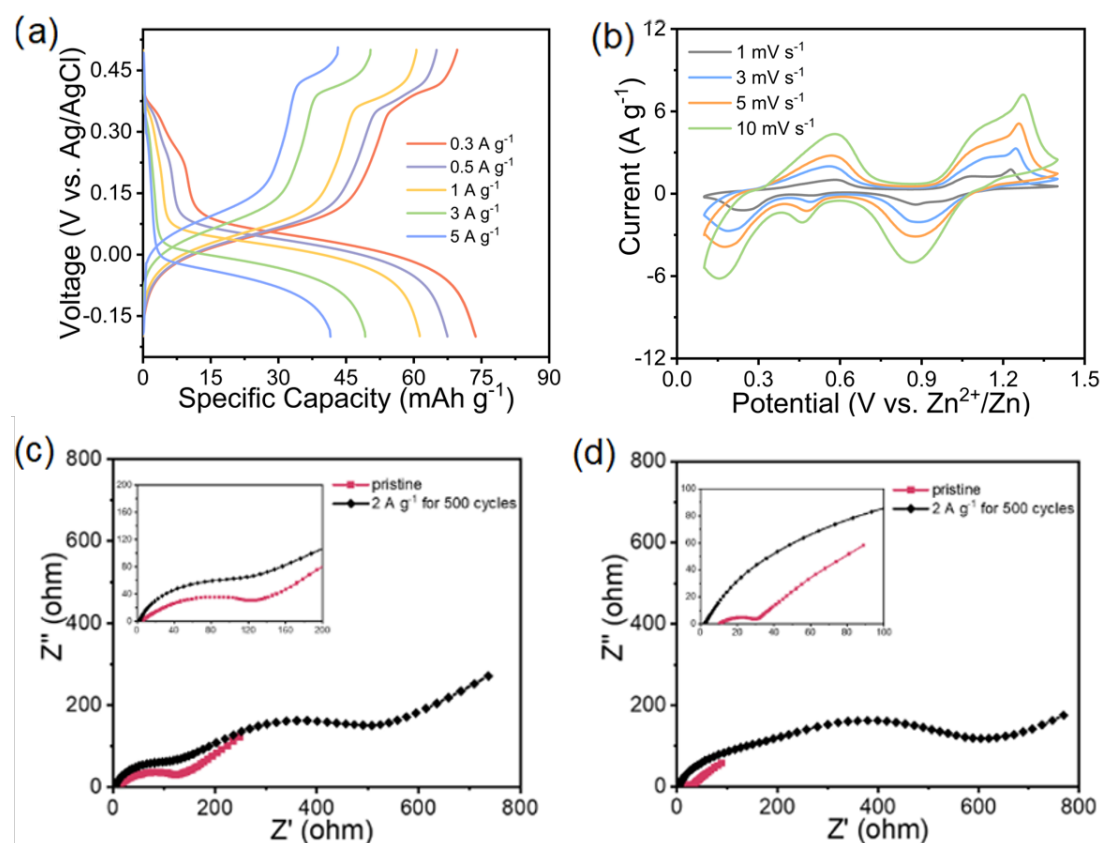

**Figure S7.** (a) GCD curves of TTPQ from 0.3 A g<sup>-1</sup> to 5 A g<sup>-1</sup> in 1 M H<sub>2</sub>SO<sub>4</sub> electrolyte. (b) Typical CV curves of DCTPQ at a series scan rate of 1, 3, 5, 10 mV s<sup>-1</sup> in 2 M ZnSO<sub>4</sub> electrolyte in the voltage range of 0.1-1.4 V vs. Zn<sup>2+</sup>/Zn. Electrochemical impedance spectra of (c) DCTPQ and (d) TTPQ at pristine state and 500 cycles at 2 A g<sup>-1</sup>, respectively.

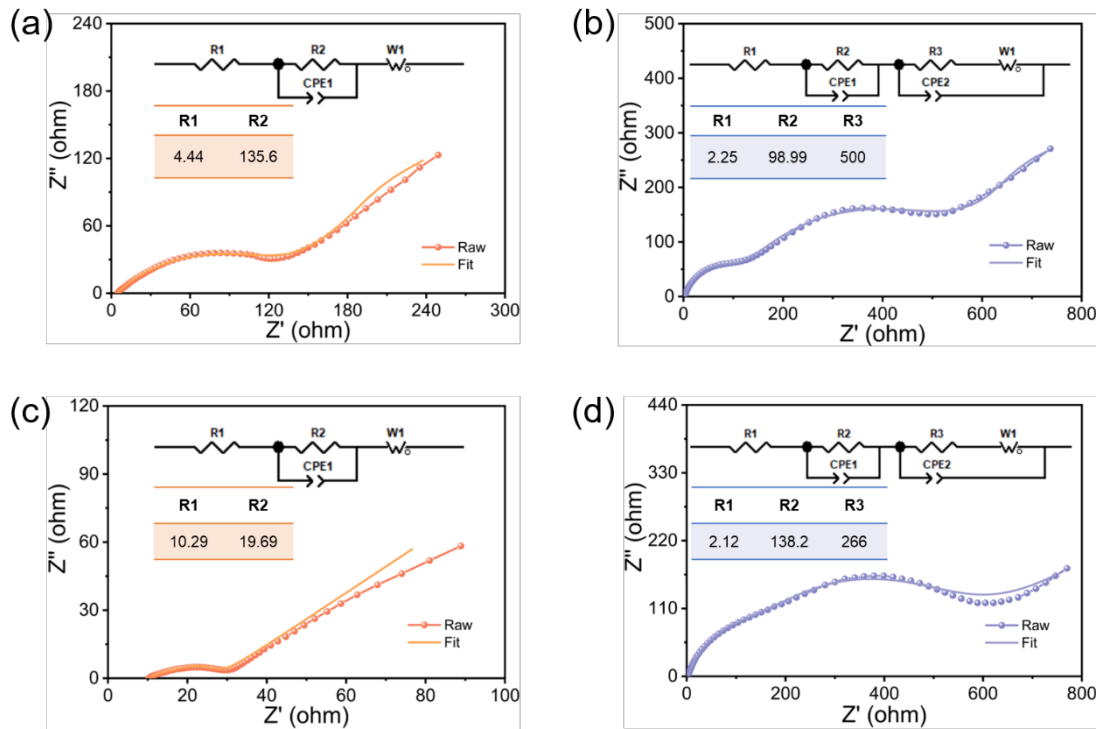

**Figure S8.** EIS plots and fitted spectra of DCTPQ (a, b) and TTPQ (c, d) at pristine state and 500 cycles at  $2 \text{ A g}^{-1}$ , respectively. The corresponding equivalent circuit models fitted and the values of each resistor are shown as inset figures. The series resistance ( $R_1$ ) includes the resistance of the electrolyte, separator and electrode materials.  $R_2$  represents the interface resistance between the electrolyte and electrode after 500 cycles, and the charge transfer resistance ( $R_{ct}$ :  $R_2$  at pristine state and  $R_3$  after 500 cycles) is associated with the semicircle at high-frequency region. Warburg impedance ( $Z_w$ ) is shown as a straight diagonal line at the low-frequency end, which is related to the diffusion process.

**Table S2.** Fitted parameters of the elements in the below equivalent circuit for the EIS data in Figure S7c&7d and Figure S8.

| Sample | State             | $R_1$ | $R_2$ | $R_3$ | $CPE_{1-T}$           | $CPE_{1-P}$ | $W_{1-R}$ | $W_{1-T}$ | $W_{1-P}$ | $CPE_{2-T}$           | $CPE_{2-P}$ |
|--------|-------------------|-------|-------|-------|-----------------------|-------------|-----------|-----------|-----------|-----------------------|-------------|
| DCTPQ  | Pristine          | 4.44  | 135.6 |       | $1.23 \times 10^{-3}$ | 0.544       | 433.4     | 92.69     | 0.582     |                       |             |
|        | 500 <sup>th</sup> | 2.25  | 98.99 | 500   | $7.28 \times 10^{-5}$ | 0.853       | 900       | 93        | 0.606     | $9.94 \times 10^{-4}$ | 0.677       |
| TTPQ   | Pristine          | 10.29 | 19.69 |       | $2.52 \times 10^{-3}$ | 0.528       | 209.7     | 94.38     | 0.582     |                       |             |



|  |                   |      |       |     |                       |       |     |       |       |                       |       |
|--|-------------------|------|-------|-----|-----------------------|-------|-----|-------|-------|-----------------------|-------|
|  | 500 <sup>th</sup> | 2.12 | 138.2 | 266 | $1.57 \times 10^{-4}$ | 0.770 | 405 | 49.38 | 0.169 | $5.77 \times 10^{-4}$ | 0.752 |
|--|-------------------|------|-------|-----|-----------------------|-------|-----|-------|-------|-----------------------|-------|

**Table S3.** Electrochemical performance comparison of reported n-type organic cathode materials for aqueous rechargeable zinc batteries, corresponding to Figure 2(f).

| Material | Electrolyte                                              | Voltage Range<br>(Average Voltage) | Capacity<br>(Current density)                          | Capacity retention<br>@current density<br>(Cycle number) | Reference |
|----------|----------------------------------------------------------|------------------------------------|--------------------------------------------------------|----------------------------------------------------------|-----------|
| C4Q      | 3 M<br>Zn(CF <sub>3</sub> SO <sub>3</sub> ) <sub>2</sub> | 0.2–1.8 V<br>(1.0 V)               | 335 mA h g <sup>-1</sup><br>(0.02 A g <sup>-1</sup> )  | 87%@0.5 A g <sup>-1</sup><br>(1000 cycles)               | S2        |
| PTO      | 2 M ZnSO <sub>4</sub>                                    | 0.36-1.46 V<br>(0.8 V)             | 336 mA h g <sup>-1</sup><br>(0.04 A g <sup>-1</sup> )  | 70%@3 A g <sup>-1</sup><br>(1000 cycles)                 | S3        |
| DTT      | 2 M ZnSO <sub>4</sub>                                    | 0.3-1.4 V<br>(0.76 V)              | 205 mA h g <sup>-1</sup><br>(0.043 A g <sup>-1</sup> ) | 70%@0.217 A g <sup>-1</sup><br>(200 cycles)              | S4        |
| PQ-Δ     | 3 M<br>Zn(CF <sub>3</sub> SO <sub>3</sub> ) <sub>2</sub> | 0.25-1.6 V<br>(0.78 V)             | 203 mA h g <sup>-1</sup><br>(0.03 A g <sup>-1</sup> )  | 99.9%@0.15 A g <sup>-1</sup><br>(500 cycles)             | S5        |
| HATN     | 2 M ZnSO <sub>4</sub>                                    | 0.3-1.1 V<br>(0.53 V)              | 370 mA h g <sup>-1</sup><br>(0.11 A g <sup>-1</sup> )  | 93%@5 A g <sup>-1</sup><br>(5000 cycles)                 | S6        |
| HATN-3CN | 2 M ZnSO <sub>4</sub>                                    | 0.1-1.6 V<br>(0.64 V)              | 320 mA h g <sup>-1</sup><br>(0.05 A g <sup>-1</sup> )  | 91%@5 A g <sup>-1</sup><br>(5800 cycles)                 | S7        |
| TAPQ     | 1 M ZnSO <sub>4</sub>                                    | 0.5-1.6V<br>(0.84 V)               | 270 mA h g <sup>-1</sup><br>(0.05 A g <sup>-1</sup> )  | 94%@0.05 A g <sup>-1</sup><br>(260 cycles)               | S1        |
| PTCDA    | 2 M ZnCl <sub>2</sub>                                    | 0.05-1.0 V<br>(0.5 V)              | 123 mA h g <sup>-1</sup><br>(0.2 A g <sup>-1</sup> )   | 81%@8 A g <sup>-1</sup><br>(500 cycles)                  | S8        |
| PA-COF   | 1 M ZnSO <sub>4</sub>                                    | 0.2-1.8 V<br>(0.7V)                | 247 mA h g <sup>-1</sup><br>(0.1 A g <sup>-1</sup> )   | 74%@1 A g <sup>-1</sup><br>(10000 cycles)                | S9        |
| TTPQ     | 2M ZnSO <sub>4</sub>                                     | 0.1-1.4 V<br>(1.07 V)              | 404 mA h g <sup>-1</sup><br>(0.3 A g <sup>-1</sup> )   | 94%@0.5 A g <sup>-1</sup><br>(250 cycles)                | This work |

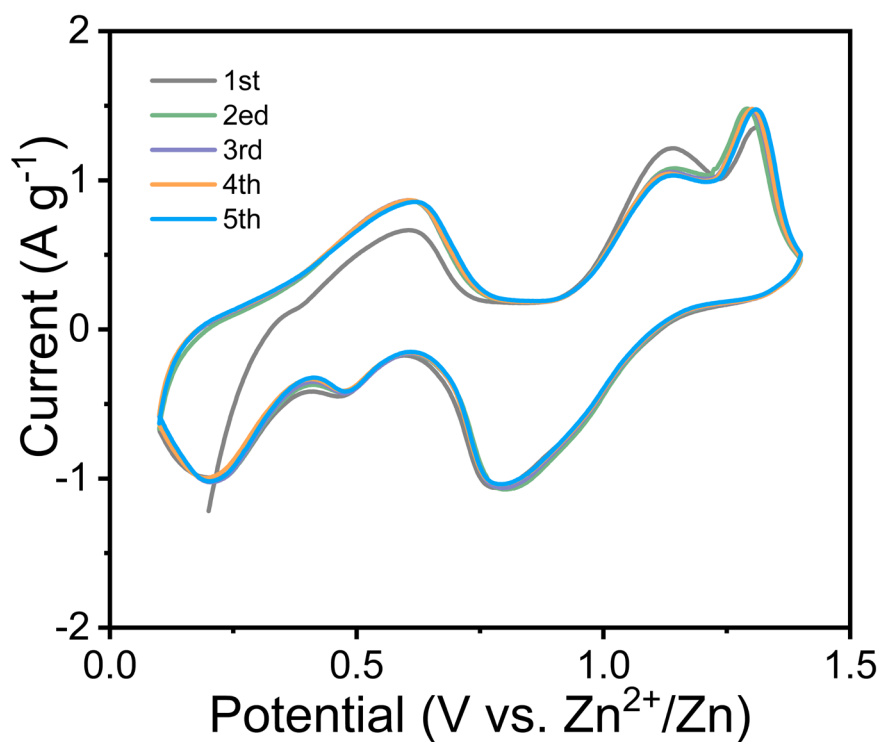

**Figure S9.** The first five CV curves of TTPQ in 2M ZnSO<sub>4</sub> electrolyte at 1 mV s<sup>-1</sup>.

### 9. SEM of TTPQ

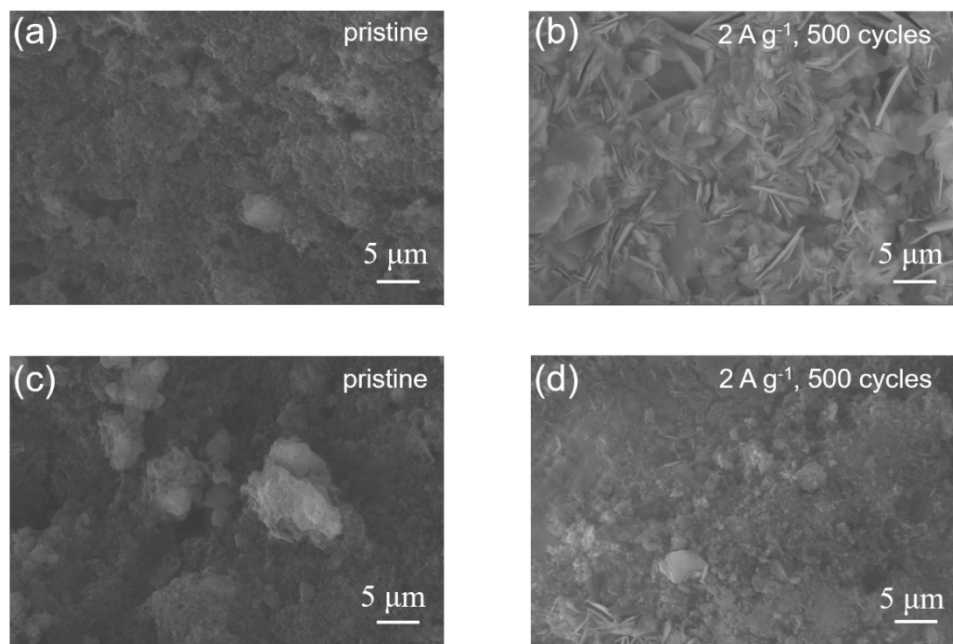

**Figure S10.** SEM images for (a, b) DCTPQ and (c, d) TTPQ electrode before and after 500 GCD cycles in AZIBs.

## 10. Ex-situ characterization during charge/discharge process

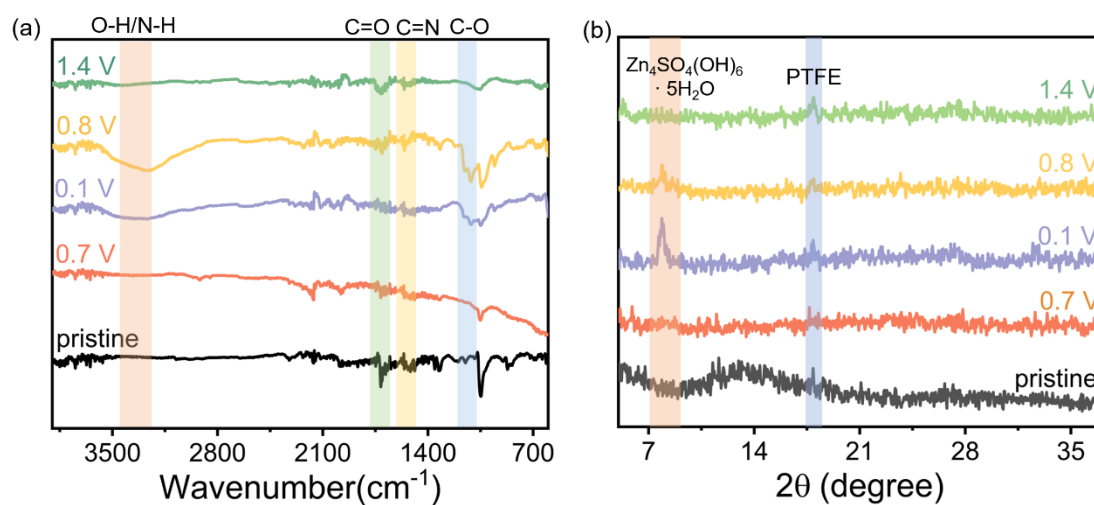

**Figure S11.** Ex-situ XRD patterns and FT-IR spectra of TTPQ electrodes during charge/discharge process.

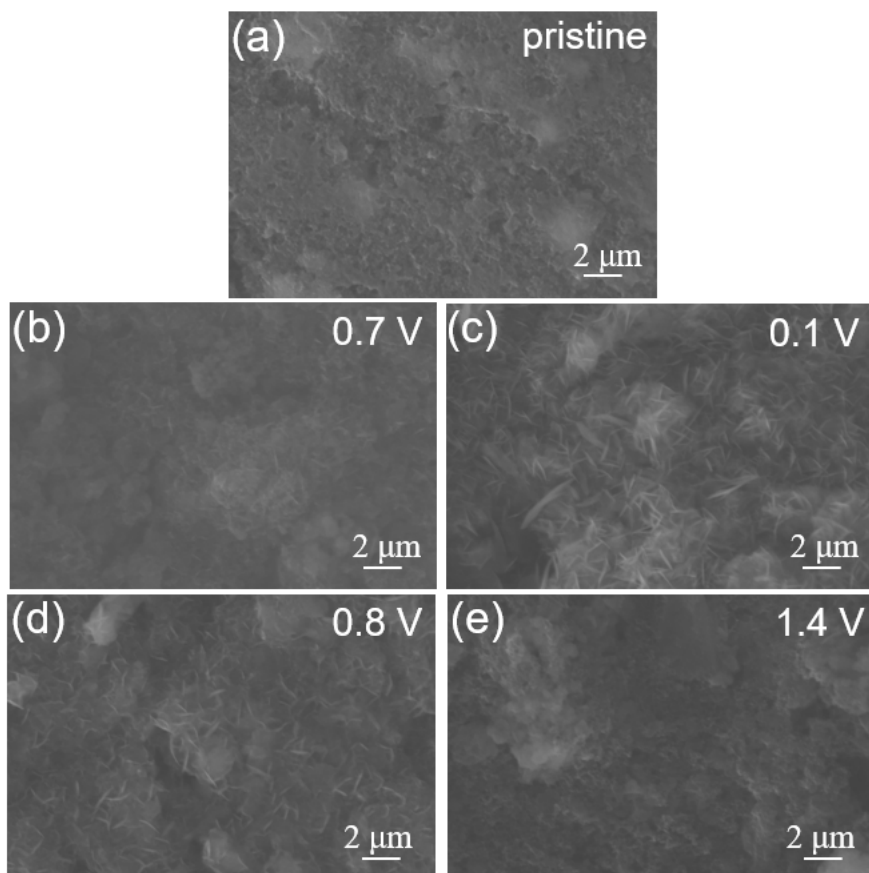

**Figure S12.** Ex-situ SEM images of TTPQ electrodes during charge/discharge process.

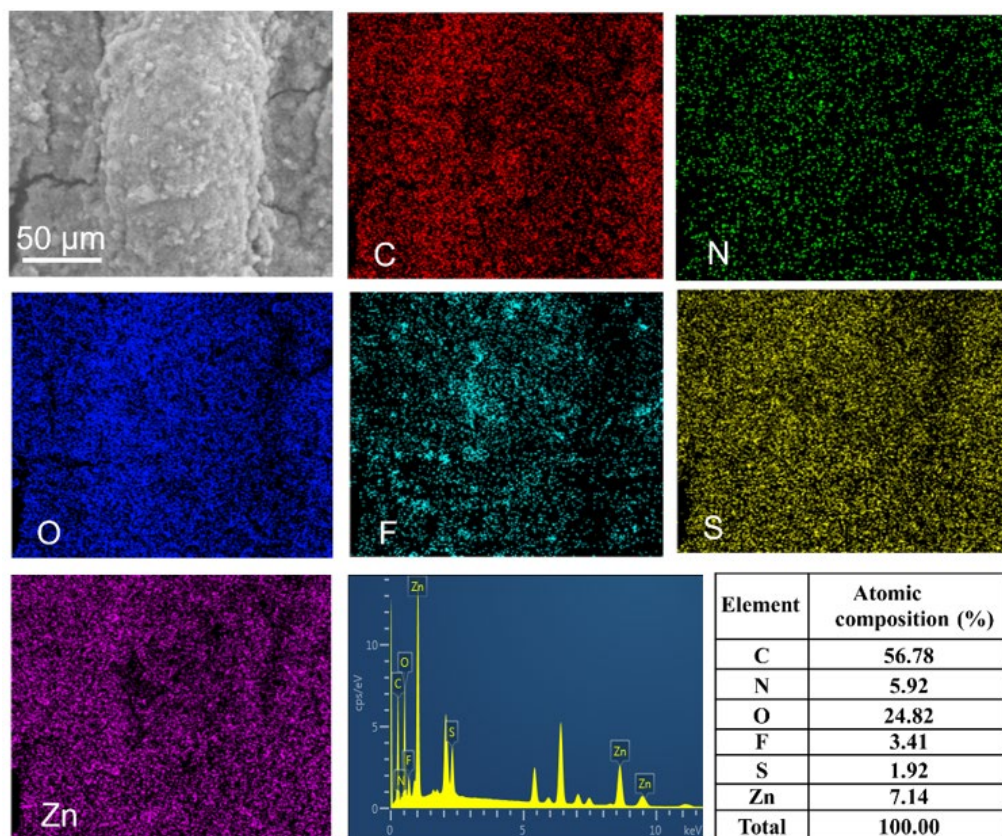

**Figure S13.** SEM image of TTPQ electrode and elemental mapping for C, N, O, F (from PTFE), S (from electrolyte  $\text{ZnSO}_4$ ) and Zn at the discharged state of 0.1 V.

## 11. DFT calculation

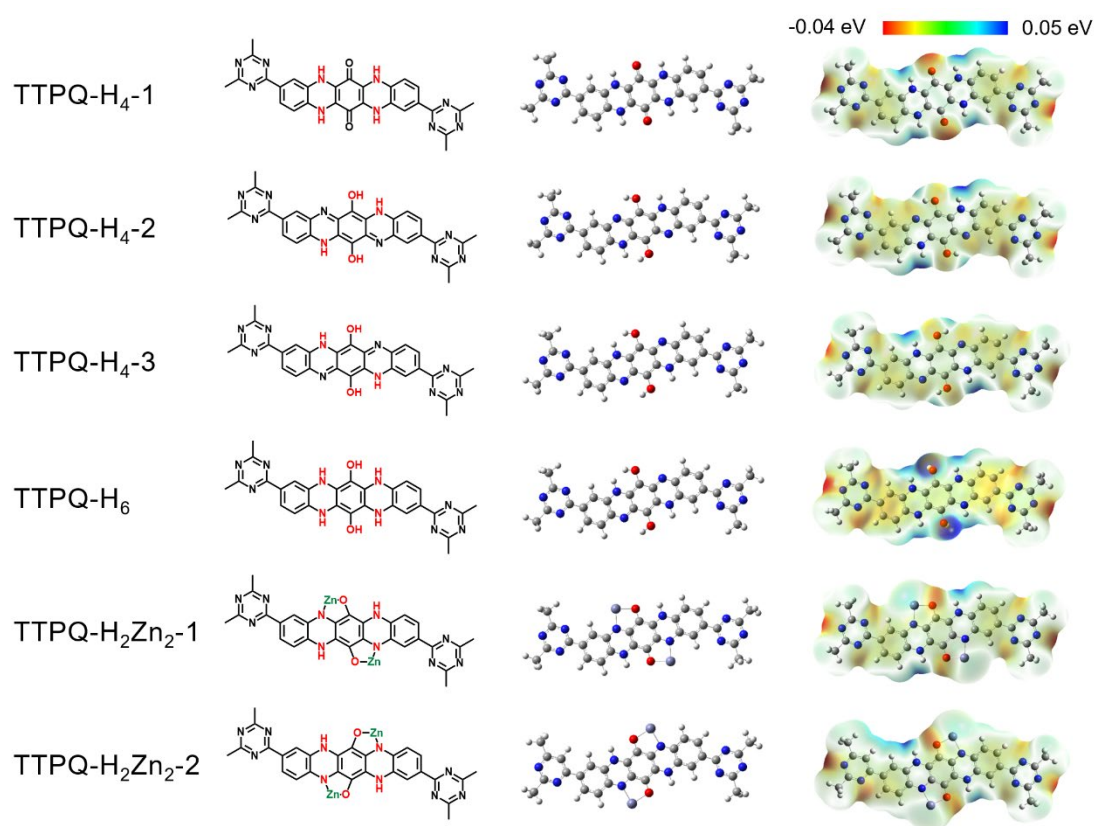

**Figure S14.** Possible geometric configurations of TTPQ molecules bonding H<sup>+</sup> and (or) Zn<sup>2+</sup> and the calculated molecular electrostatic potential (MESP).

## References

- (S1) Gao, Y.; Li, G.; Wang, F.; Chu, J.; Yu, P.; Wang, B.; Zhan, H.; Song, Z. A High-performance Aqueous Rechargeable Zinc Battery Based on Organic Cathode Integrating Quinone and Pyrazine. *Energy Storage Mater.* **2021**, *40*, 31-40.
- (S2) Zhao, Q.; Huang, W.; Luo, Z.; Liu, L.; Lu, Y.; Li, Y.; Li, L.; Hu, J.; Ma, H.; Chen, J. High-capacity Aqueous Zinc Batteries Using Sustainable Quinone Electrodes. *Sci. Adv.* **2018**, *4*: eaao1761.
- (S3) Guo, Z.; Ma, Y.; Dong, X.; Huang, J.; Wang, Y.; Xia, Y. An Environmentally Friendly and Flexible Aqueous Zinc Battery Using an Organic Cathode. *Angew. Chem., Int. Ed.* **2018**, *57*, 11737-11741.
- (S4) Wang, Y.; Wang, C.; Ni, Z.; Gu, Y.; Wang, B.; Guo, Z.; Wang, Z.; Bin, D.; Ma, J.; Wang, Y. Binding Zinc Ions by Carboxyl Groups from Adjacent Molecules Toward Long-life Aqueous Zinc-organic Batteries. *Adv. Mater.* **2020**, *32*, 2000338.
- (S5) Nam, K. W.; Kim, H.; Beldjoudi, Y.; Kwon, T. W.; Kim, D. J.; Stoddart, J. F. Redox-Active Phenanthrenequinone Triangles in Aqueous Rechargeable Zinc Batteries. *J. Am. Chem. Soc.* **2020**, *142*, 2541-2548.
- (S6) Tie, Z.; Liu, L.; Deng, S.; Zhao, D.; Niu, Z. Proton Insertion Chemistry of a Zinc-organic Battery. *Angew. Chem., Int. Ed.* **2020**, *59* (12), 4920-4924.
- (S7) Ye, Z.; Xie, S.; Cao, Z.; Wang, L.; Ye, M. High-Rate Aqueous Zinc-Organic Battery Achieved by Lowering HOMO/LUMO of Organic Cathode. *Energy Storage Mater.* **2021**, *37*, 378-386.
- (S8) Zhang, H.; Fang, Y.; Yang, F.; Liu, X.; Lu, X. 2020. Aromatic Organic Molecular Crystal with Enhanced  $\pi$ - $\pi$  Stacking Interaction for Ultrafast Zn-ion Storage. *Energy Environ. Sci.* **2020**, *13*, 2515-2523.
- (S9) Wang, W.; Kale, V. S.; Cao, Z.; Kandambeth, S.; Zhang, W.; Ming, J.; Parvatkar, P. T.; Abou-Hamad, E.; Shekhah, O.; Cavallo, L.; et al. Phenanthroline Covalent Organic Framework Electrodes for High-performance Zinc-ion Supercapattery. *ACS Energy Lett.* **2020**, *5*, 2256-2264.
